# Supplementary material for: Safety and Immunogenicity of a Recombinant Plasmodium falciparum AMA1 Malaria Vaccine Adjuvanted with Alhydrogel™, Montanide ISA 720 or AS02
Source: PubMed Central journal article supplement (PMC2602972; doi:10.1371/journal.pone.0003960), 2008-12-18
Supplement: pone.0003960.s004.pdf [file pone.0003960.s004.pdf]

|                                     |                                                                                                                                                                                                                                                                                                                  |                 |                   |
|-------------------------------------|------------------------------------------------------------------------------------------------------------------------------------------------------------------------------------------------------------------------------------------------------------------------------------------------------------------|-----------------|-------------------|
| <b>E.M.V.I.</b>                     | <b>Protocol Amendment</b>                                                                                                                                                                                                                                                                                        | Trial code:     | <b>AMA-1_1_03</b> |
| European Malaria Vaccine Initiative | <i>Title: Assessment of the Safety and Immunogenicity of three Formulations of the Recombinant <i>Picbia pastoris</i> Apical Membrane Antigen 1 (PfAMA-1-FVO[25-45]), Blood-stage Malaria Vaccine in Healthy Dutch Adult Volunteers : a Phase 1, Single-Blind, Randomised, Dose-escalating, Unicentre trial.</i> | Version No.:    | <b>1</b>          |
| <b>Good Clinical Practices</b>      |                                                                                                                                                                                                                                                                                                                  | Effective Date: | 16/05/05          |

### 1. Signatures

I have read the amendment and agree that the trial will be conducted according to the procedures described.

| Function                                             | Name                  | Date     | Signature                                                                           |
|------------------------------------------------------|-----------------------|----------|-------------------------------------------------------------------------------------|
| Principal Investigator                               | Prof Robert Sauerwein | 24/6/05  | 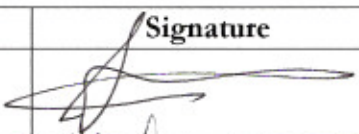 |
| Investigator                                         | Dr Meta Roestenberg   | 24/06/05 |  |
| E.M.V.I. Project manager                             | Dr Hildur E. Blythman | 24.06.05 |  |
| E.M.V.I. Director of Clinical and Regulatory Affairs | Dr Odile Leroy        | 22/06/05 |  |

|                                     |                                                                                                                                                                                                                                                                                                                  |                 |                   |
|-------------------------------------|------------------------------------------------------------------------------------------------------------------------------------------------------------------------------------------------------------------------------------------------------------------------------------------------------------------|-----------------|-------------------|
| <b>E.M.V.I.</b>                     | <b>Protocol Amendment</b>                                                                                                                                                                                                                                                                                        | Trial code:     | <b>AMA-I_1_03</b> |
| European Malaria Vaccine Initiative | <i>Title: Assessment of the Safety and Immunogenicity of three Formulations of the Recombinant <i>Pichia pastoris</i> Apical Membrane Antigen 1 (PfAMA-1-FVO[25-45]), Blood-stage Malaria Vaccine in Healthy Dutch Adult Volunteers : a Phase 1, Single-Blind, Randomised, Dose-escalating, Unicentre trial.</i> | Version No.:    | <b>1</b>          |
| <b>Good Clinical Practices</b>      |                                                                                                                                                                                                                                                                                                                  | Effective Date: | 16/05/05          |

## 2. Justification of the amendment

The paragraphs modified by this amendment are described below. Other paragraphs remain unchanged

---

Page 35 and 36

### 7.2.2. Cellular Immune response:

#### 2. Parameters to be measured, Method and Timing of Measurement

Cytokine production will be assayed by ELISPOT for the cytokines IL-4 and IFN $\gamma$

*Change to:*

Cytokine production will be assayed by ELISPOT for the cytokines IL-5 and IFN $\gamma$

Justification for the change:

- The IL-4 production of Polymorphic Blood Mononuclear Cells (PBMC's) measured in the ELISPOT is low as compared to the IL-5 production. Therefore, due to the low numbers of spots, the read-out will be less reproducible and the intra-assay variability will be higher as compared to IL-5.
- ELISPOT results from this study can easily be compared with the IFN $\gamma$ /IL-5 data published by researchers of GSK[1], [2], one of the co-investigators in this study.

[1] Walsh DS, Pichyangkul S, Gettayacamin M, et al. Safety and immunogenicity of rts,s+trap malaria vaccine, formulated in the as02a adjuvant system, in infant rhesus monkeys. *Am.J.Trop.Med.Hyg.* 2004;70(5):499-509.

[2] Pichyangkul S, Gettayacamin M, Miller RS, et al. Pre-clinical evaluation of the malaria vaccine candidate *P. falciparum* MSP1(42) formulated with novel adjuvants or with alum. *Vaccine* 2004;22(29-30):3831-40.

|                                                                              |
|------------------------------------------------------------------------------|
| This information is the property of EMVI and all rights are reserved by EMVI |
|------------------------------------------------------------------------------|

|                                     |                                                                                                                                                                                                                                                                                                                  |                 |                   |
|-------------------------------------|------------------------------------------------------------------------------------------------------------------------------------------------------------------------------------------------------------------------------------------------------------------------------------------------------------------|-----------------|-------------------|
| <b>E.M.V.I.</b>                     | <b>Protocol Amendment</b>                                                                                                                                                                                                                                                                                        | Trial code:     | <b>AMA-1_1_03</b> |
| European Malaria Vaccine Initiative | <i>Title: Assessment of the Safety and Immunogenicity of three Formulations of the Recombinant <i>Picbia pastoris</i> Apical Membrane Antigen 1 (PfAMA-1-FVO[25-45]), Blood-stage Malaria Vaccine in Healthy Dutch Adult Volunteers : a Phase 1, Single-Blind, Randomised, Dose-escalating, Unicentre trial.</i> | Version No.:    | <b>1</b>          |
| <b>Good Clinical Practices</b>      |                                                                                                                                                                                                                                                                                                                  | Effective Date: | 16/05/05          |

### 3. Appendixes

#### 1. Amendment List

| Amendment number | Date     | Protocol file name | Version | EC submission |      |
|------------------|----------|--------------------|---------|---------------|------|
|                  |          |                    |         | Yes/ No       | date |
| 1                | 03/03/05 | PAMAI 050303       | Final_1 | No            |      |
| 2                | 16/05/05 | PAMAI 050516       | Final_2 |               |      |

#### 2. Amended protocol
