# Supplementary material for: Safety and Immunogenicity of a Recombinant Plasmodium falciparum AMA1 Malaria Vaccine Adjuvanted with Alhydrogel™, Montanide ISA 720 or AS02
Source: PubMed Central journal article supplement (PMC2602972; doi:10.1371/journal.pone.0003960), 2008-12-18
Supplement: pone.0003960.s007.pdf [file pone.0003960.s007.pdf]

|                                     |                                                                                                                                                                                                                                                                                                                                               |                 |            |
|-------------------------------------|-----------------------------------------------------------------------------------------------------------------------------------------------------------------------------------------------------------------------------------------------------------------------------------------------------------------------------------------------|-----------------|------------|
| E.M.V.I.                            | <b>Protocol Amendment</b><br><i>Title: Assessment of the Safety and Immunogenicity of three Formulations of the Recombinant <i>Picbia pastoris</i> Apical Membrane Antigen 1 (PfAMA-1-FVO[25-45]), Blood-stage Malaria Vaccine in Healthy Dutch Adult Volunteers : a Phase 1, Single-Blind, Randomised, Dose-escalating, Unicentre trial.</i> | Trial code:     | AMA-1_1_03 |
| European Malaria Vaccine Initiative |                                                                                                                                                                                                                                                                                                                                               | Version No.:    | 1          |
| Good Clinical Practices             |                                                                                                                                                                                                                                                                                                                                               | Effective Date: | 20/10/05   |

## Signatures

I have read the amendments and agree that the trial will be conducted according to the procedures described.

| Function                    | Name                     | Date     | Signature                                                                            |
|-----------------------------|--------------------------|----------|--------------------------------------------------------------------------------------|
| Principal Investigator      | Prof Robert W. Sauerwein |          |                                                                                      |
| Investigator                | Dr Meta Roestenberg      |          |                                                                                      |
| E.M.V.I. Project Manager    | Dr Hildur E. Blythman    | 21/10/05 | 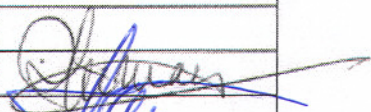  |
| E.M.V.I. Executive Director | Dr Sören Jepsen          | 24/10/05 |  |

This information is the property of EMVI and all rights are reserved by EMVI

|                                     |                                                                                                                                                                                                                                                                                                                                                |                 |                   |
|-------------------------------------|------------------------------------------------------------------------------------------------------------------------------------------------------------------------------------------------------------------------------------------------------------------------------------------------------------------------------------------------|-----------------|-------------------|
| <b>E.M.V.I.</b>                     | <b>Protocol Amendment</b><br><i>Title: Assessment of the Safety and Immunogenicity of three Formulations of the Recombinant <i>Picbia pastoris</i> Apical Membrane Antigen 1 (PfAMA-1-FVO[25-45J]), Blood-stage Malaria Vaccine in Healthy Dutch Adult Volunteers : a Phase 1, Single-Blind, Randomised, Dose-escalating, Unicentre trial.</i> | Trial code:     | <b>AMA-1_1_03</b> |
| European Malaria Vaccine Initiative |                                                                                                                                                                                                                                                                                                                                                | Version No.:    | <b>1</b>          |
| <b>Good Clinical Practices</b>      |                                                                                                                                                                                                                                                                                                                                                | Effective Date: | 20/10/05          |

## Amendment N° 8

The paragraphs modified by this amendment are described below. Other paragraphs remain unchanged.

---

**Page 37**

### 7.4.4 Statistical Methods

The analysis shall be descriptive; the sample size does not allow any comparison between groups. For categorical variables, frequency distributions, by vaccination group, will be presented. For continuous variables, box-whisker plots, medians, inter-quartile ranges and ranges will be presented by vaccination group.

The analysis plan will be available before the lock of the data base for the interim analysis after the second injection of vaccine.

*Change to:*

### 7.4.4 Statistical Methods

The analysis shall be descriptive; the sample size does not allow any comparison between groups. For categorical variables, frequency distributions, by vaccination group, will be presented. For continuous variables, box-whisker plots, medians, inter-quartile ranges and ranges will be presented by vaccination group.

The analysis plan will be available before the lock of the data base for the interim analysis after the **third** injection of vaccine. **The interim analysis will be performed with data collected up to Visit 16 (Day 70).**

Justification for the change:

Since the vaccination schedule was changed (cf. Amendment N° 4), the 3<sup>rd</sup> vaccination will be given 28 days after the 2<sup>nd</sup> vaccination, instead of after 84 days; therefore, it is preferable to perform the interim analysis soon after the 3<sup>rd</sup> vaccination. The purpose of this interim analysis is to allow the choice of the best vaccination regime for the follow-up Phase Ib trial to be performed in Mali.

---

|                                                                              |
|------------------------------------------------------------------------------|
| This information is the property of EMVI and all rights are reserved by EMVI |
|------------------------------------------------------------------------------|

|                                     |                                                                                                                                                                                                                                                                                                                                                |                 |                   |
|-------------------------------------|------------------------------------------------------------------------------------------------------------------------------------------------------------------------------------------------------------------------------------------------------------------------------------------------------------------------------------------------|-----------------|-------------------|
| <b>E.M.V.I.</b>                     | <b>Protocol Amendment</b><br><i>Title: Assessment of the Safety and Immunogenicity of three Formulations of the Recombinant <i>Picbia pastoris</i> Apical Membrane Antigen 1 (PfAMA-1-FVO[25-45J]), Blood-stage Malaria Vaccine in Healthy Dutch Adult Volunteers : a Phase 1, Single-Blind, Randomised, Dose-escalating, Unicentre trial.</i> | Trial code:     | <b>AMA-1_1_03</b> |
| European Malaria Vaccine Initiative |                                                                                                                                                                                                                                                                                                                                                | Version No.:    | <b>1</b>          |
| <b>Good Clinical Practices</b>      |                                                                                                                                                                                                                                                                                                                                                | Effective Date: | 20/10/05          |

## Appendixes

### 1. Amendment List

| Amendment number | Date     | Protocol file name | Version | EC submission |          |
|------------------|----------|--------------------|---------|---------------|----------|
|                  |          |                    |         | Yes/ No       | date     |
| 1                | 03/03/05 | PAMA1_050303       | Final_1 | Yes           | 27/05/05 |
| 2                | 16/05/05 | PAMAI_050516       | Final_2 | Yes           | 27/05/05 |
| 3                | 21/06/05 | PAMAI_050516       | Final_2 | Yes           | 27/05/05 |
| 4                | 21/06/05 | PAMAI_050516       | Final_2 | Yes           | 27/05/05 |
| 5                | 21/06/05 | PAMAI_050516       | Final_2 | Yes           | 27/05/05 |
| 6                | 13/09/05 | PAMAI_050516       | Final_2 | No            |          |
| 7                | 13/09/05 | PAMAI_050516       | Final_2 | No            |          |
| 8                | 20/10/05 | PAMA1_050516       | Final_2 | No            |          |

This information is the property of EMVI and all rights are reserved by EMVI
